# Supplementary material for: An intra-population analysis of the indris’ song dissimilarity in the light of genetic distance
Source: PubMed Central journal article supplement (PMC5579264; doi:10.1038/s41598-017-10656-9), 2017-08-31
Supplement: 41598_2017_10656_MOESM1_ESM.pdf [file 41598_2017_10656_MOESM1_ESM.pdf]

## An intra-population analysis of the indris' song dissimilarity in the light of genetic distance.

Valeria Torti<sup>1‡</sup>, Giovanna Bonadonna<sup>1‡</sup>, Chiara De Gregorio<sup>1</sup>, Daria Valente<sup>1</sup>, Rose Marie Randrianarison<sup>2,3</sup>, Olivier Friard<sup>1</sup>, Luca Pozzi<sup>4</sup>, Marco Gamba<sup>1†\*</sup>,  
Cristina Giacoma<sup>1†</sup>

<sup>1</sup> *Department of Life Sciences and Systems Biology (DBIOS), University of Torino, Italy*

<sup>2</sup> *Département de Paléontologie et d'Anthropologie Biologique, Faculté des Sciences, Université d'Antananarivo, Antananarivo, Madagascar.*

<sup>3</sup> *Groupe d'étude et de recherche sur les primates de Madagascar (GERP), Antananarivo, Madagascar*

<sup>4</sup> *Department of Anthropology, The University of Texas at San Antonio, One UTSA Circle, San Antonio, TX 78249, United States of America.*

<sup>‡</sup> *joint primary author*

<sup>†</sup> *joint senior author*

<sup>\*</sup> *to whom correspondence should be addressed, postal address:*

*Department of Life Sciences and Systems Biology,*

*University of Torino,*

*10134 Torino*

*Italy*

**Supplementary Table S1** Factor loadings for temporal parameters of DP2 on the first four principal components.

|                                        | <i>PARAMETER</i> | <i>COMPONENT 1</i> | <i>COMPONENT 2</i> | <i>COMPONENT 3</i> | <i>COMPONENT 4</i> |
|----------------------------------------|------------------|--------------------|--------------------|--------------------|--------------------|
| <b>DP2<br/>TEMPORAL<br/>PARAMETERS</b> | IOI1             | 0.957              | -0.132             | 0.088              | 0.107              |
|                                        | Dur_Unit1        | 0.833              | 0.288              | 0.435              | 0.146              |
|                                        | Dur_Int1         | 0.757              | -0.498             | -0.281             | 0.03               |
|                                        | Dur_Unit2        | 0.688              | 0.547              | 0.151              | -0.392             |
|                                        | PtMin_Unit1      | 0.478              | 0.454              | -0.447             | 0.217              |
|                                        | PtMax_Unit2      | 0.337              | -0.674             | 0.179              | -0.185             |
|                                        | PercDur_Unit1    | 0.021              | 0.352              | 0.731              | 0.505              |
|                                        | PercDur_Unit2    | -0.179             | 0.786              | 0.109              | -0.55              |
|                                        | PtMin_Unit2      | -0.334             | 0.395              | -0.246             | 0.501              |
|                                        | PtMax_Unit1      | -0.407             | -0.4               | 0.646              | -0.093             |

**Supplementary Table S2** Factor loadings for frequency parameters of DP2 on the first five principal components.

|                                         | <i>PARAMETER</i>                | <i>COMPONENT</i> | <i>COMPONENT</i> | <i>COMPONENT</i> | <i>COMPONENT</i> | <i>COMPONENT</i> |
|-----------------------------------------|---------------------------------|------------------|------------------|------------------|------------------|------------------|
|                                         |                                 | 1                | 2                | 3                | 4                | 5                |
| <b>DP2<br/>FREQUENCY<br/>PARAMETERS</b> | f <sub>0</sub> mean_Unit2       | 0.889            | 0.276            | -0.339           | 0.007            | 0.041            |
|                                         | f <sub>0</sub> mean_Unit1       | 0.874            | -0.395           | 0.19             | -0.154           | 0.031            |
|                                         | Q75_Unit1                       | 0.864            | -0.362           | 0.107            | -0.259           | 0.086            |
|                                         | Q50_Unit1                       | 0.857            | -0.386           | 0.102            | -0.249           | 0.083            |
|                                         | Q25_Unit1                       | 0.849            | -0.409           | 0.098            | -0.328           | 0.08             |
|                                         | Q50_Unit2                       | 0.849            | 0.211            | -0.436           | -0.1             | 0.07             |
|                                         | Q75_Unit2                       | 0.849            | 0.192            | -0.436           | -0.103           | 0.078            |
|                                         | Q25_Unit2                       | 0.848            | 0.228            | -0.434           | -0.096           | 0.06             |
|                                         | f <sub>0</sub> min_Unit2        | 0.813            | 0.273            | -0.413           | 0.005            | 0.008            |
|                                         | f <sub>0</sub> max_Unit1        | 0.812            | 0.011            | 0.478            | -0.043           | -0.058           |
|                                         | f <sub>0</sub> max_Unit2        | 0.76             | 0.389            | 0.041            | 0.355            | 0.122            |
|                                         | f <sub>0</sub> start_Unit1      | 0.664            | 0.573            | 0.066            | 0.338            | -0.236           |
|                                         | f <sub>0</sub> start_Unit2      | 0.664            | 0.573            | 0.066            | 0.338            | -0.236           |
|                                         | f <sub>0</sub> min_Unit1        | 0.656            | -0.683           | 0.084            | 0.189            | -0.087           |
|                                         | f <sub>0</sub> end_Unit1        | 0.51             | -0.735           | 0.145            | 0.286            | -0.07            |
|                                         | f <sub>0</sub> end_Unit2        | 0.51             | -0.735           | 0.145            | 0.286            | -0.07            |
|                                         | f <sub>0</sub> abs_slope_Unit1  | 0.444            | 0.518            | 0.673            | -0.1             | -0.094           |
|                                         | f <sub>0</sub> abs_slope_Unit2  | 0.444            | 0.518            | 0.673            | -0.1             | -0.094           |
|                                         | f <sub>0</sub> rangeratio_Unit2 | 0.021            | 0.058            | 0.215            | 0.446            | 0.845            |
|                                         | f <sub>0</sub> rangeratio_Unit1 | 0.009            | 0.464            | 0.296            | -0.401           | 0.345            |

**Supplementary Table S3** Factor loadings for temporal parameters of DP3 on the first six principal components.

|                                        | <i>PARAMETER</i> | <i>COMPONENT</i> | <i>COMPONENT</i> | <i>COMPONENT</i> | <i>COMPONENT</i> | <i>COMPONENT</i> | <i>COMPONENT</i> |
|----------------------------------------|------------------|------------------|------------------|------------------|------------------|------------------|------------------|
|                                        |                  | 1                | 2                | 3                | 4                | 5                | 6                |
| <b>DP3<br/>TEMPORAL<br/>PARAMETERS</b> | IOI2             | 0.896            | 0.257            | -0.232           | -0.118           | -0.178           | -0.015           |
|                                        | Dur_Int2         | 0.849            | -0.186           | -0.331           | -0.138           | -0.256           | -0.176           |
|                                        | IOI1             | 0.835            | 0.24             | 0.35             | 0.218            | 0.127            | -0.144           |
|                                        | Dur_Int1         | 0.801            | -0.149           | 0.399            | -0.105           | 0.322            | 0.028            |
|                                        | Dur_Unit2        | 0.58             | 0.753            | 0.001            | -0.041           | 0.003            | 0.212            |
|                                        | PercDur_Int2     | 0.557            | -0.591           | -0.41            | -0.126           | -0.351           | -0.128           |
|                                        | Dur_Unit1        | 0.556            | 0.566            | 0.166            | 0.482            | -0.13            | -0.273           |
|                                        | PtMax_Unit3      | 0.512            | -0.141           | -0.341           | 0.133            | 0.101            | 0.404            |
|                                        | PtMax_Unit2      | 0.36             | -0.275           | 0.225            | 0.466            | 0.429            | 0.025            |
|                                        | PercDur_Int1     | 0.297            | -0.626           | 0.533            | -0.088           | 0.375            | 0.178            |
|                                        | PtMin_Unit1      | 0.207            | 0.115            | 0.608            | -0.338           | -0.312           | -0.075           |
|                                        | Dur_Unit3        | 0.204            | 0.808            | -0.115           | -0.288           | 0.299            | -0.231           |
|                                        | PercDur_Unit2    | -0.098           | 0.724            | 0.048            | 0.027            | -0.072           | 0.537            |
|                                        | PtMin_Unit2      | -0.138           | 0.073            | 0.413            | 0.066            | -0.453           | 0.403            |
|                                        | PtMax_Unit1      | -0.139           | -0.067           | -0.555           | 0.566            | 0.217            | 0.069            |
|                                        | PercDur_Unit1    | -0.315           | 0.202            | 0.249            | 0.789            | -0.288           | -0.209           |
|                                        | PtMin_Unit3      | -0.391           | -0.168           | 0.429            | -0.07            | -0.077           | -0.235           |
|                                        | PercDur_Unit3    | -0.593           | 0.568            | -0.13            | -0.305           | 0.329            | -0.196           |

**Supplementary Table S4** Factor loadings for frequency parameters of DP3 on the first six principal components.

|                                         | <i>PARAMETER</i>                | <i>COMPONENT</i> | <i>COMPONENT</i> | <i>COMPONENT</i> | <i>COMPONENT</i> | <i>COMPONENT</i> | <i>COMPONENT</i> |
|-----------------------------------------|---------------------------------|------------------|------------------|------------------|------------------|------------------|------------------|
|                                         |                                 | 1                | 2                | 3                | 4                | 5                | 6                |
| <b>DP3<br/>FREQUENCY<br/>PARAMETERS</b> | f <sub>0</sub> min_Unit2        | 0.897            | -0.029           | -0.11            | -0.355           | -0.172           | 0.068            |
|                                         | Q50_Unit2                       | 0.878            | -0.062           | -0.22            | -0.358           | -0.099           | 0.03             |
|                                         | Q75_Unit2                       | 0.878            | -0.078           | -0.224           | -0.35            | -0.088           | 0.025            |
|                                         | Q25_Unit2                       | 0.876            | -0.047           | -0.213           | -0.365           | -0.11            | 0.036            |
|                                         | f <sub>0</sub> mean_Unit2       | 0.818            | -0.463           | 0.239            | -0.036           | 0.074            | -0.077           |
|                                         | Q75_Unit1                       | 0.812            | -0.455           | 0.172            | -0.164           | 0.049            | -0.092           |
|                                         | Q50_Unit1                       | 0.81             | -0.461           | 0.166            | -0.154           | 0.043            | -0.097           |
|                                         | Q25_Unit1                       | 0.808            | -0.466           | 0.163            | -0.142           | 0.039            | -0.099           |
|                                         | f <sub>0</sub> min_Unit2        | 0.796            | -0.046           | -0.23            | -0.314           | -0.288           | 0.051            |
|                                         | f <sub>0</sub> max_Unit1        | 0.784            | -0.174           | 0.426            | -0.025           | 0.195            | -0.064           |
|                                         | f <sub>0</sub> mean_Unit3       | 0.768            | 0.449            | -0.371           | 0.194            | 0.116            | -0.001           |
|                                         | f <sub>0</sub> max_Unit2        | 0.739            | 0.045            | 0.144            | -0.316           | -0.312           | 0.241            |
|                                         | f <sub>0</sub> min_Unit3        | 0.721            | 0.377            | -0.426           | 0.099            | 0.064            | 0.04             |
|                                         | Q25_Unit3                       | 0.716            | 0.348            | -0.476           | 0.179            | 0.262            | -0.035           |
|                                         | Q50_Unit3                       | 0.713            | 0.348            | -0.476           | 0.184            | 0.272            | -0.042           |
|                                         | Q75_Unit3                       | 0.709            | 0.333            | -0.475           | 0.188            | 0.279            | -0.048           |
|                                         | f <sub>0</sub> min_Unit1        | 0.597            | -0.635           | 0.162            | 0.397            | -0.059           | 0.039            |
|                                         | f <sub>0</sub> max_Unit3        | 0.533            | 0.604            | 0.131            | 0.276            | -0.33            | -0.14            |
|                                         | f <sub>0</sub> end_Unit1        | 0.513            | -0.613           | 0.159            | 0.541            | 0.04             | 0.023            |
|                                         | f <sub>0</sub> end_Unit2        | 0.513            | -0.613           | 0.159            | 0.541            | 0.04             | 0.023            |
|                                         | f <sub>0</sub> end_Unit3        | 0.513            | -0.613           | 0.159            | 0.541            | 0.04             | 0.023            |
|                                         | f <sub>0</sub> start_Unit1      | 0.475            | 0.708            | 0.178            | 0.354            | -0.116           | 0.068            |
|                                         | f <sub>0</sub> start_Unit2      | 0.475            | 0.708            | 0.178            | 0.354            | -0.116           | 0.068            |
|                                         | f <sub>0</sub> start_Unit3      | 0.475            | 0.708            | 0.178            | 0.354            | -0.116           | 0.068            |
|                                         | f <sub>0</sub> abs_slope_Unit1  | 0.343            | 0.462            | 0.741            | -0.182           | 0.188            | 0.014            |
|                                         | f <sub>0</sub> abs_slope_Unit2  | 0.343            | 0.462            | 0.741            | -0.182           | 0.188            | 0.014            |
|                                         | f <sub>0</sub> abs_slope_Unit3  | 0.343            | 0.462            | 0.741            | -0.182           | 0.188            | 0.014            |
|                                         | f <sub>0</sub> rangeratio_Unit3 | 0.043            | 0.243            | 0.234            | 0.191            | -0.511           | -0.473           |
|                                         | f <sub>0</sub> rangeratio_Unit1 | -0.031           | 0.246            | 0.039            | -0.348           | 0.381            | -0.4             |
|                                         | f <sub>0</sub> rangeratio_Unit2 | -0.056           | 0.068            | 0.157            | -0.011           | 0.072            | 0.73             |

**Supplementary Table S5** Matrix of genetic relatedness (*trioml* estimator) among the individuals of the study groups of the indris of Maromizaha.

|             | befotsy | bemasoandro | berthe | bevolo | cesare | emilio | eva   | fanihy | hendry | jery  | jonah | koto  | maintso | max   | mena  | ovy   | ratsytarehy | sissie | soa   | tsaratarehy | zafy  | zandry | zokybe |
|-------------|---------|-------------|--------|--------|--------|--------|-------|--------|--------|-------|-------|-------|---------|-------|-------|-------|-------------|--------|-------|-------------|-------|--------|--------|
| befotsy     | 1       | 0           | 0      | 0      | 0      | 0.038  | 0     | 0      | 0.114  | 0     | 0     | 0.142 | 0       | 0     | 0     | 0     | 0           | 0      | 0     | 0.051       | 0     | 0      | 0.155  |
| bemasoandro | 0       | 1           | 0.101  | 0      | 0.77   | 0      | 0     | 0.483  | 0      | 0.268 | 0.252 | 0     | 0.111   | 0.076 | 0     | 0     | 0           | 0.06   | 0.169 | 0           | 0.54  | 0      | 0.139  |
| berthe      | 0       | 0.101       | 1      | 0.55   | 0.153  | 0      | 0     | 0.043  | 0      | 0.709 | 0     | 0     | 0.449   | 0.302 | 0.053 | 0     | 0           | 0.167  | 0     | 0           | 0     | 0.063  | 0      |
| bevolo      | 0       | 0           | 0.55   | 1      | 0.04   | 0      | 0     | 0      | 0      | 0.07  | 0     | 0     | 0.359   | 0.032 | 0     | 0     | 0           | 0.007  | 0.088 | 0           | 0.089 | 0      | 0.118  |
| cesare      | 0       | 0.77        | 0.153  | 0.04   | 1      | 0      | 0     | 0.361  | 0      | 0.222 | 0.375 | 0     | 0.147   | 0.04  | 0     | 0     | 0.053       | 0      | 0.111 | 0           | 0.5   | 0.04   | 0.173  |
| emilio      | 0.038   | 0           | 0      | 0      | 0      | 1      | 0.274 | 0      | 0.003  | 0     | 0     | 0.148 | 0.068   | 0     | 0     | 0.525 | 0           | 0      | 0     | 0           | 0     | 0      | 0.118  |
| eva         | 0       | 0           | 0      | 0      | 0      | 0.274  | 1     | 0      | 0.417  | 0     | 0     | 0     | 0       | 0     | 0     | 0.277 | 0           | 0      | 0     | 0           | 0     | 0      | 0      |
| fanihy      | 0       | 0.483       | 0.043  | 0      | 0.361  | 0      | 0     | 1      | 0      | 0.088 | 0.027 | 0     | 0       | 0.465 | 0     | 0     | 0.18        | 0.061  | 0.665 | 0.25        | 0.105 | 0      | 0      |
| hendry      | 0.114   | 0           | 0      | 0      | 0      | 0.003  | 0.417 | 0      | 1      | 0.037 | 0     | 0.417 | 0       | 0     | 0.005 | 0     | 0           | 0.203  | 0     | 0           | 0     | 0      | 0      |
| jery        | 0       | 0.268       | 0.709  | 0.07   | 0.222  | 0      | 0     | 0.088  | 0.037  | 1     | 0     | 0.037 | 0.566   | 0.293 | 0.037 | 0.037 | 0           | 0.304  | 0     | 0.188       | 0     | 0.026  | 0      |
| jonah       | 0       | 0.252       | 0      | 0      | 0.375  | 0      | 0     | 0.027  | 0      | 0     | 1     | 0.057 | 0       | 0     | 0     | 0     | 0.204       | 0      | 0.172 | 0           | 0.595 | 0.204  | 0.212  |
| koto        | 0.142   | 0           | 0      | 0      | 0      | 0.148  | 0     | 0      | 0.417  | 0.037 | 0.057 | 1     | 0       | 0     | 0     | 0     | 0           | 0.149  | 0     | 0           | 0     | 0      | 0      |
| maintso     | 0       | 0.111       | 0.449  | 0.359  | 0.147  | 0.068  | 0     | 0      | 0      | 0.566 | 0     | 0     | 1       | 0     | 0.148 | 0     | 0           | 0      | 0     | 0           | 0     | 0      | 0      |
| max         | 0       | 0.076       | 0.302  | 0.032  | 0.04   | 0      | 0     | 0.465  | 0      | 0.293 | 0     | 0     | 0       | 1     | 0     | 0     | 0           | 0      | 0     | 0           | 0     | 0      | 0      |
| mena        | 0       | 0           | 0.053  | 0      | 0      | 0      | 0     | 0      | 0.005  | 0.037 | 0     | 0     | 0.148   | 0     | 1     | 0     | 0           | 0.063  | 0     | 0.375       | 0     | 0.36   | 0      |
| ovy         | 0       | 0           | 0      | 0      | 0      | 0.525  | 0.277 | 0      | 0      | 0.037 | 0     | 0     | 0       | 0     | 0     | 1     | 0           | 0.578  | 0     | 0           | 0     | 0      | 0      |
| ratsytarehy | 0       | 0           | 0      | 0      | 0.053  | 0      | 0     | 0.18   | 0      | 0     | 0.204 | 0     | 0       | 0     | 0     | 0     | 1           | 0      | 0.164 | 0.08        | 0     | 0.445  | 0.248  |
| sissie      | 0       | 0.06        | 0.167  | 0.007  | 0      | 0      | 0     | 0.061  | 0.203  | 0.304 | 0     | 0.149 | 0       | 0     | 0.063 | 0.578 | 0           | 1      | 0     | 0.134       | 0     | 0      | 0      |
| soa         | 0       | 0.169       | 0      | 0.088  | 0.111  | 0      | 0     | 0.665  | 0      | 0     | 0.172 | 0     | 0       | 0     | 0     | 0     | 0.164       | 0      | 1     | 0.375       | 0.276 | 0      | 0      |
| tsaratarehy | 0.051   | 0           | 0      | 0      | 0      | 0      | 0     | 0.25   | 0      | 0.188 | 0     | 0     | 0       | 0     | 0.375 | 0     | 0.08        | 0.134  | 0.375 | 1           | 0     | 0.5    | 0.206  |
| zafy        | 0       | 0.54        | 0      | 0.089  | 0.5    | 0      | 0     | 0.105  | 0      | 0     | 0.595 | 0     | 0       | 0     | 0     | 0     | 0           | 0      | 0.276 | 0           | 1     | 0      | 0      |
| zandry      | 0       | 0           | 0.063  | 0      | 0.04   | 0      | 0     | 0      | 0      | 0.026 | 0.204 | 0     | 0       | 0     | 0.36  | 0     | 0.445       | 0      | 0     | 0.5         | 0     | 1      | 0.248  |
| zokybe      | 0.155   | 0.139       | 0      | 0.118  | 0.173  | 0.118  | 0     | 0      | 0      | 0     | 0.212 | 0     | 0       | 0     | 0     | 0     | 0.248       | 0      | 0     | 0.206       | 0     | 0.248  | 1      |

**Supplementary Table S6** List and abbreviations of the acoustic parameters.

| <i>PARAMETER</i>                  | <i>DESCRIPTION</i>                                                                                                    |
|-----------------------------------|-----------------------------------------------------------------------------------------------------------------------|
| Dur_Unit(x)                       | Total duration of the unit, measured in seconds                                                                       |
| PercDur_Unit(x)                   | Unit's duration percentage related to the total phrase length                                                         |
| <br>                              |                                                                                                                       |
| f <sub>0</sub> mean_Unit(x)       | Mean fundamental frequency value across the unit (Hz)                                                                 |
| f <sub>0</sub> max_Unit(x)        | Maximum fundamental frequency value across the unit (Hz)                                                              |
| f <sub>0</sub> min_Unit(x)        | Minimum fundamental frequency value across the unit (Hz)                                                              |
| f <sub>0</sub> start_Unit(x)      | Frequency value of f <sub>0</sub> and the start of the unit                                                           |
| f <sub>0</sub> end_Unit(x)        | Frequency value of f <sub>0</sub> and the end of the unit                                                             |
| ptmax_Unit(x)                     | Time % occurring from the unit beginning up to the maximum f <sub>0</sub> ,<br>assuming that the unit duration is 100 |
| ptmin_Unit(x)                     | Time % occurring from the unit beginning up to the minimum f <sub>0</sub> ,<br>assuming that the unit duration is 100 |
| f <sub>0</sub> abs_slope_Unit(x)  | Decline of the unit f <sub>0</sub> over time (Hz/s)                                                                   |
| FM_rate                           | Number of complete cycles of f <sub>0</sub> modulation per second (s <sup>-1</sup> )                                  |
| f <sub>0</sub> rangeratio_Unit(x) | Range between maximum and minimum f <sub>0</sub>                                                                      |
| Q25_Unit(x)                       | Frequency values at the upper limit of the first quartiles (Q25%) of energy                                           |
| Q50_Unit(x)                       | Frequency values at the upper limit of the second quartiles (Q50%) of energy                                          |
| Q75_Unit (x)                      | Frequency values at the upper limit of the third quartiles (Q75%) of energy                                           |
| <br>                              |                                                                                                                       |
| IOI1                              | Inter-onset interval for the first and the second unit                                                                |
| IOI2                              | Inter-onset interval for the second and the third unit                                                                |
| <br>                              |                                                                                                                       |
| Dur_int(x)                        | Duration of the interval between units                                                                                |
| PercDur_Int(x)                    | Interval's percentage duration related to the phrase total length                                                     |
